# Supplementary material for: Functional exploration of colorectal cancer genomes using Drosophila
Source: PubMed Central journal article supplement (PMC5141297; doi:10.1038/ncomms13615), 2016-11-29
Supplement: ncomms13615-s1.pdf [file ncomms13615-s1.pdf]

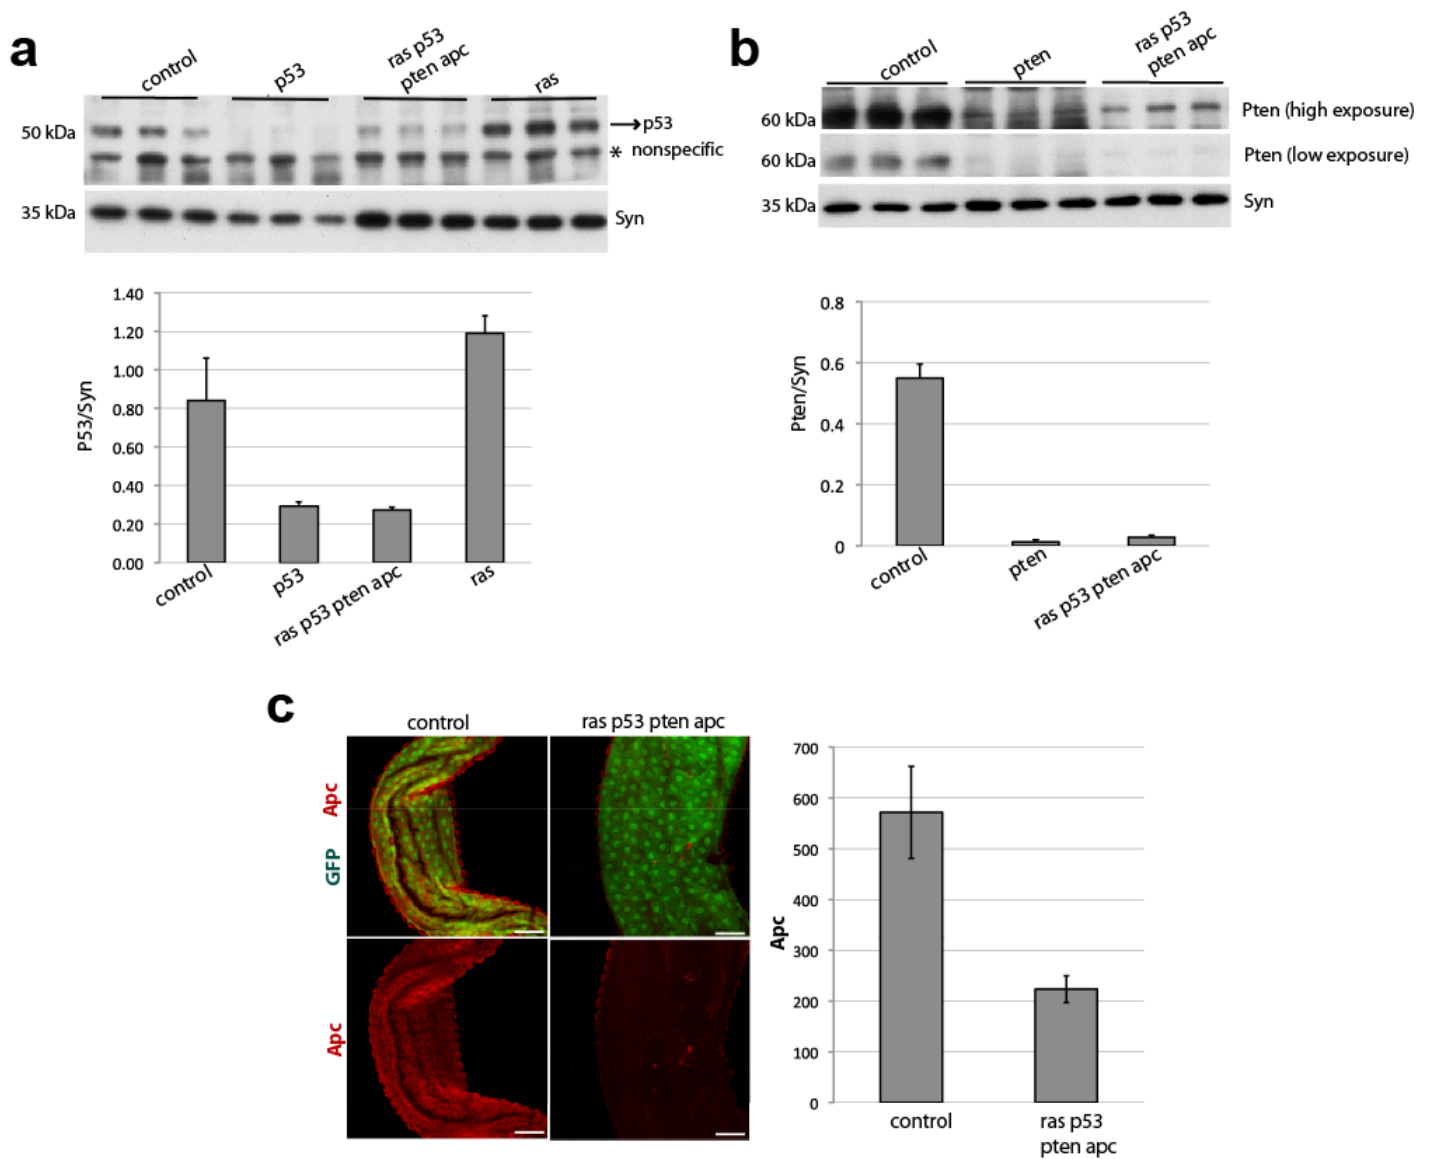

**Supplementary Figure 1. Analysis of the efficiency of knock-down in *ras<sup>v12</sup> p53<sup>Ri</sup> pten<sup>Ri</sup> apc<sup>Ri</sup>*.** Analysis of p53 and pten knock-down efficiency in *ras<sup>v12</sup> p53<sup>Ri</sup> pten<sup>Ri</sup> apc<sup>Ri</sup>* by western blot (a,b) and *apc* knock-down efficiency by immunohistochemistry (c). Scale bars: 25  $\mu$ m. Error bars: standard error of the mean. Uncropped gels used to generate panels a and b can be found in Supplementary Figure 8g,h.

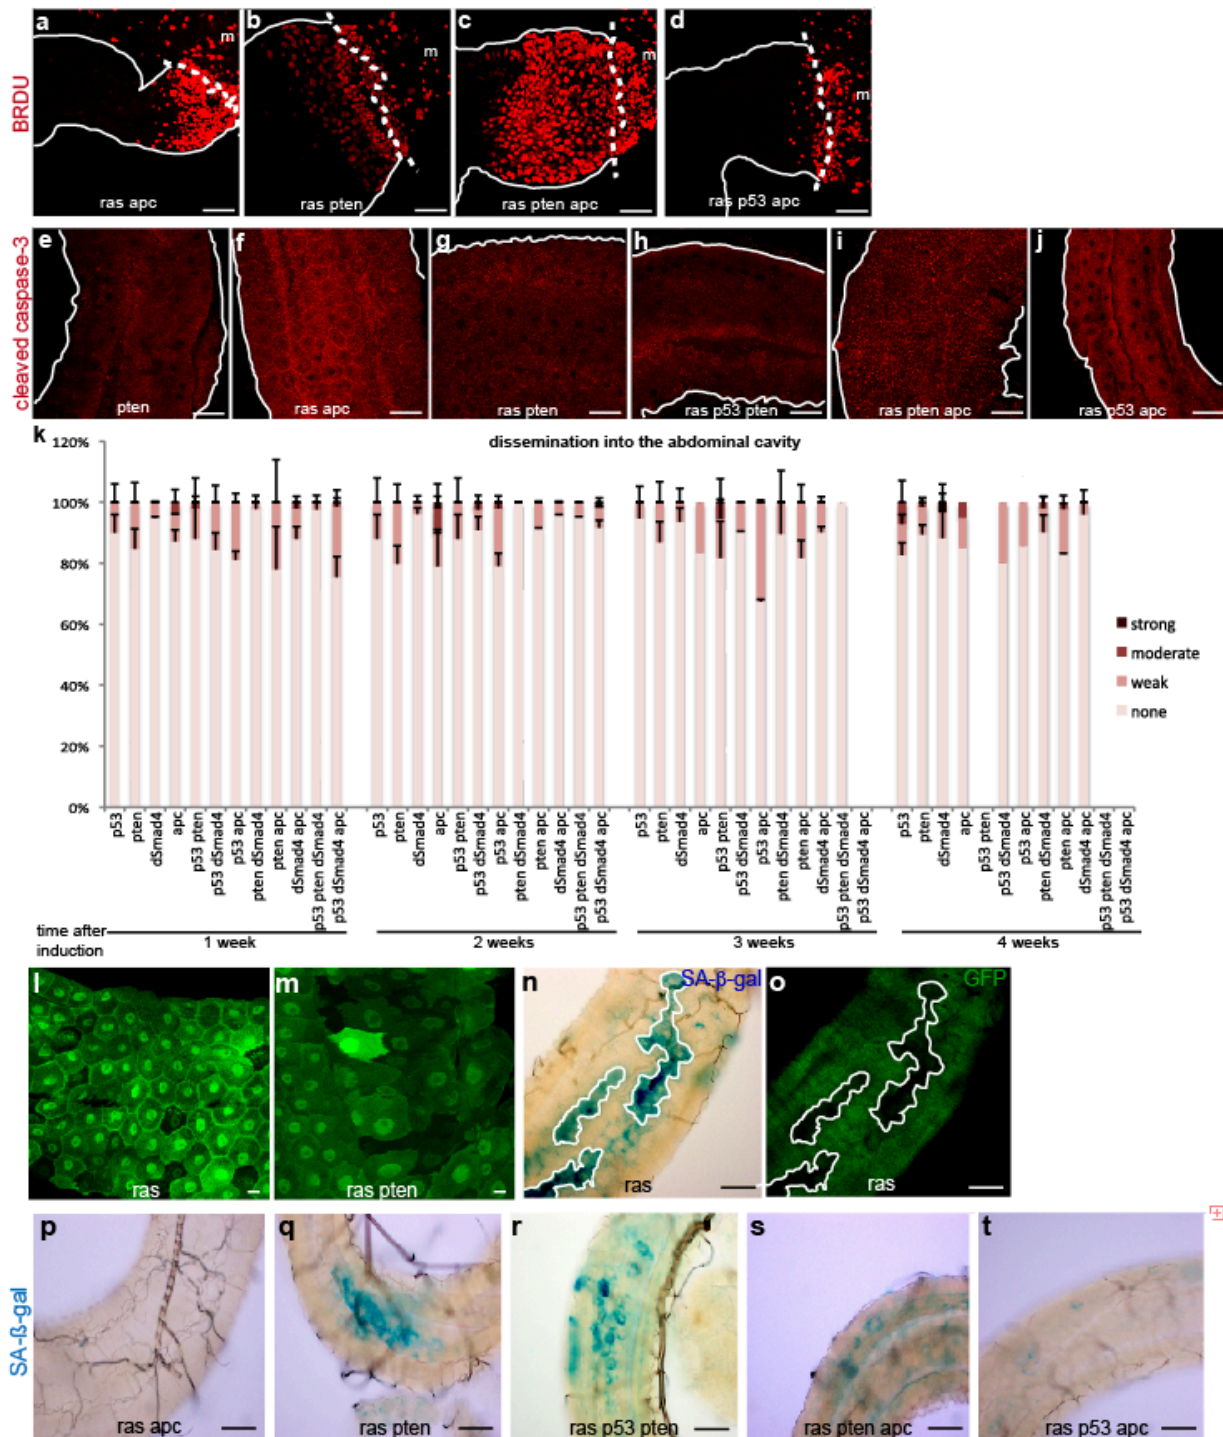

**Supplementary Figure 2. Follow-up analyses of cancer phenotypes observed in *ras<sup>V12</sup> p53<sup>Ri</sup> pten<sup>Ri</sup> apc<sup>Ri</sup>*.** a-d, 7 day continuous BRDU labeling (red) of hindguts with the indicated genotypes. Pylorus region of the hindguts are outlined with solid lines; dashed lines indicate hindgut/midgut boundary (m: midgut). e-j, Cleaved caspase-3 staining of hindguts (outlined by solid lines) with indicated genotypes. Hindgut cells occasionally displayed high levels of membrane-associated cleaved caspase (e.g. f), though its functional significance is unclear. k, Quantification of dissemination in animals with indicated genotypes 1, 2, 3 and 4 weeks after induction (n=25-30 flies/replicate; error bars: standard error of the mean). l, m, Examples of GFP negative cells from hindguts carrying *ras<sup>V12</sup>* (l) and *ras<sup>V12</sup> pten<sup>Ri</sup>* (m). n, SA-β-gal positive cells in hindguts carrying *ras<sup>V12</sup>* were also GFP negative (o). p-t, SA-β-gal staining of hindguts with indicated genotypes. Scale bars: 25 μm

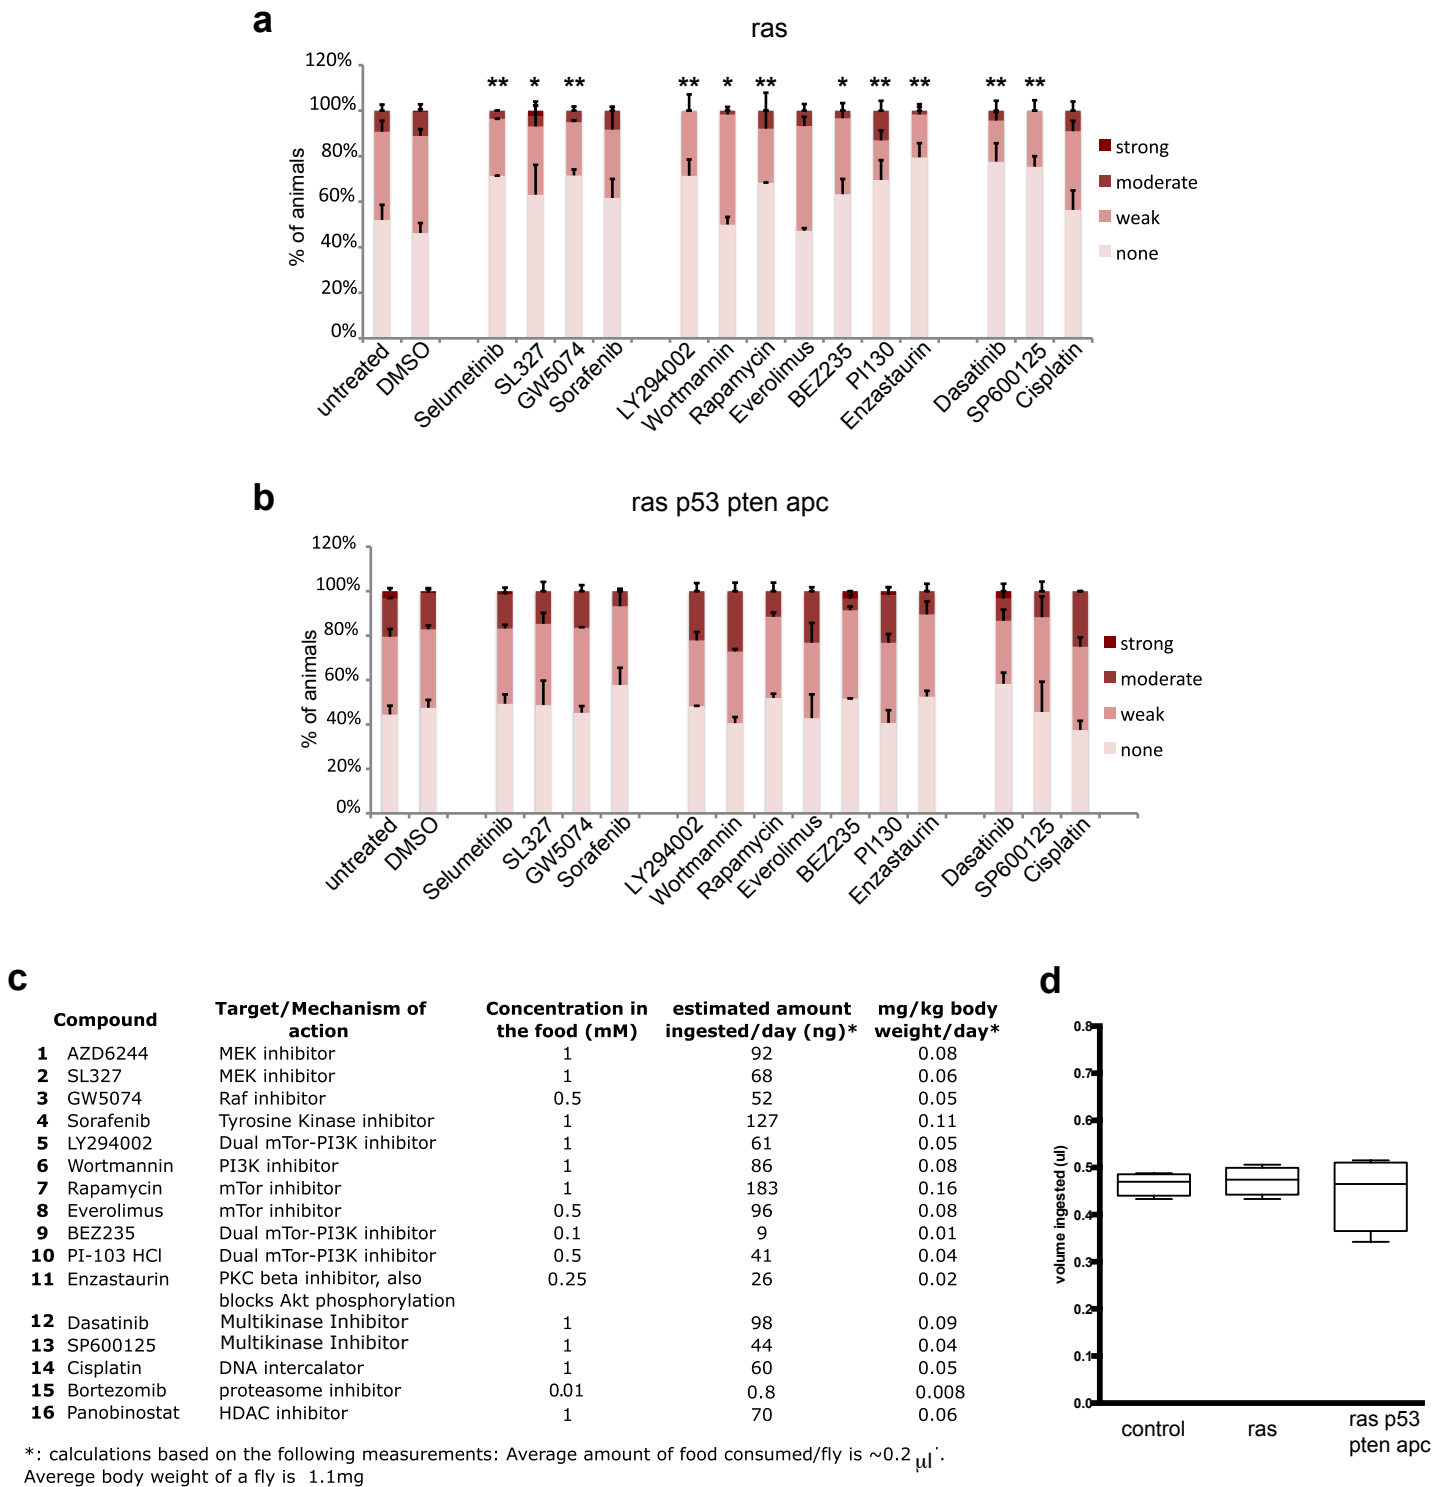

**Supplementary Figure 3. Drug response of  $ras^{V12}$  alone and  $ras^{V12} p53^{Ri} pten^{Ri} apc^{Ri}$  animals.** **a,b**, Quantification of dissemination in  $ras^{V12}$  (**a**) and  $ras^{V12} p53^{Ri} pten^{Ri} apc^{Ri}$  (**b**) animals treated with indicated compounds. **c**, List of compounds used in feeding experiments along with their targets, mechanisms of actions and concentrations used in the food. Estimated amount ingested was calculated based on our observation that adult females ingest approximately  $0.2 \mu\text{l}$  of food per day. Estimated amount of ingested compound was also converted into mg/kg body weight/day using 1.1 mg as the average weight of an adult female. **d**, Quantification of amount of food ingested by indicated genotypes. Measurements were done for a period of 8 hours, 4 days after induction of transgenes using the capillary feeding assay (CAFE). **a,b**,  $n=30$  flies/replicate; error bars: standard error of the mean \*:  $p < 0.01$ ; \*\*:  $p < 0.05$  (Fisher's exact test). Drug doses indicated reflect concentrations in the food.

**a**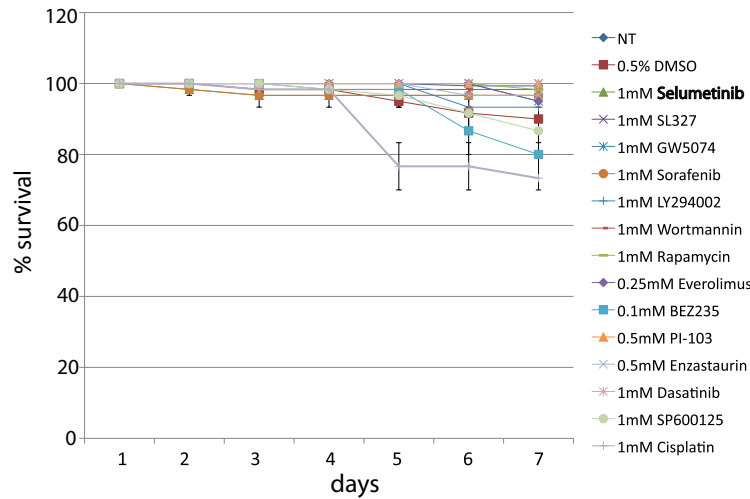**b**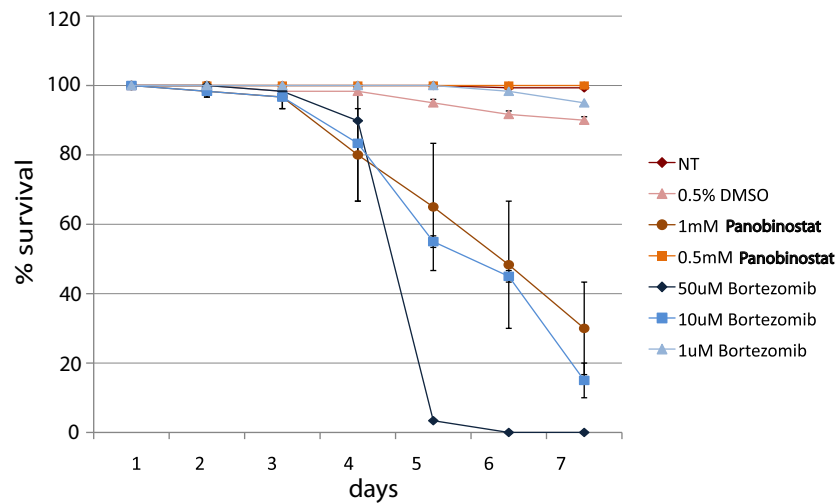**c**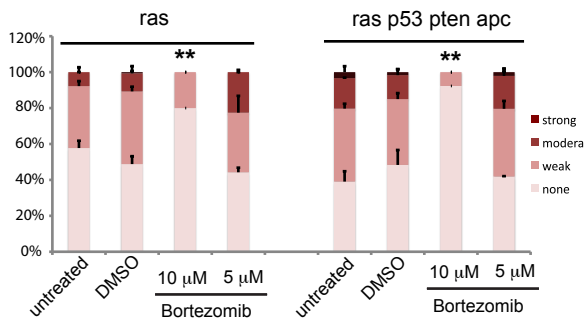**d**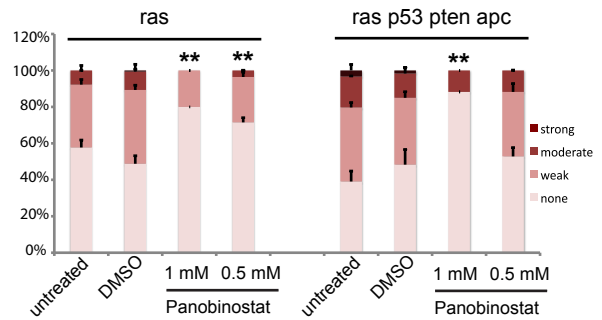

**Supplementary Figure 4. Toxicity and therapeutic window for compounds.** **a**, Survival curves of *ras<sup>V12</sup> p53<sup>Ri</sup> pten<sup>Ri</sup> apc<sup>Ri</sup>* animals fed indicated compounds. At the doses used in our experiments, compounds did not promote significant toxicity except for panobinostat and bortezomib. **b**, Survival curves of *ras<sup>V12</sup> p53<sup>Ri</sup> pten<sup>Ri</sup> apc<sup>Ri</sup>* animals fed panobinostat or bortezomib at indicated doses. **c,d**, Quantification of dissemination phenotype of animals with indicated genotypes after feeding different doses of bortezomib (**c**) and panobinostat (**d**). Bortezomib was not effective against either genotype at non-toxic doses (5  $\mu$ M in the food) while panobinostat was effective only against *ras<sup>V12</sup>* alone (500  $\mu$ M in the food). n=30 flies/replicate; error bars: standard error of the mean \*: p<0.01; \*\*: p<0.05 (Fisher's exact test). Drug doses indicated reflect concentrations in the food.

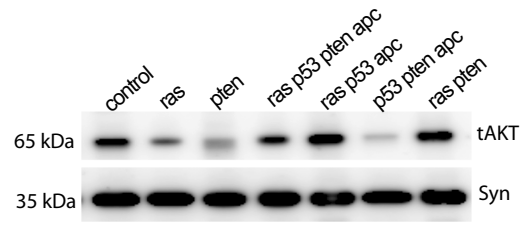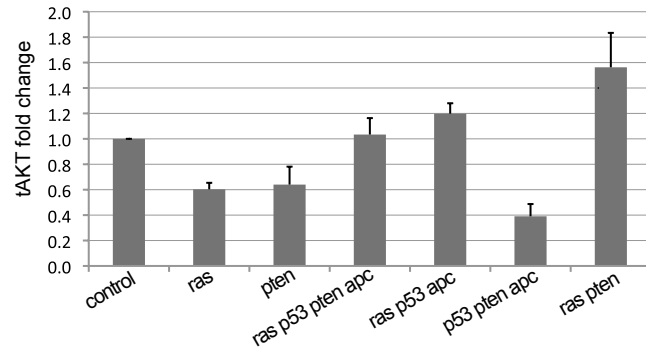

**Supplementary Figure 5. Total AKT levels in multigenic combinations.** Western blot analysis and quantification of total AKT (tAKT) from hindguts with indicated genotypes. Each data point represents the average response of 2-5 biological replicates with 10 hindguts/replicate. Error bars: standard error of the mean. Uncropped gels used to generate this panel can be found in Supplementary Figure 8ji.

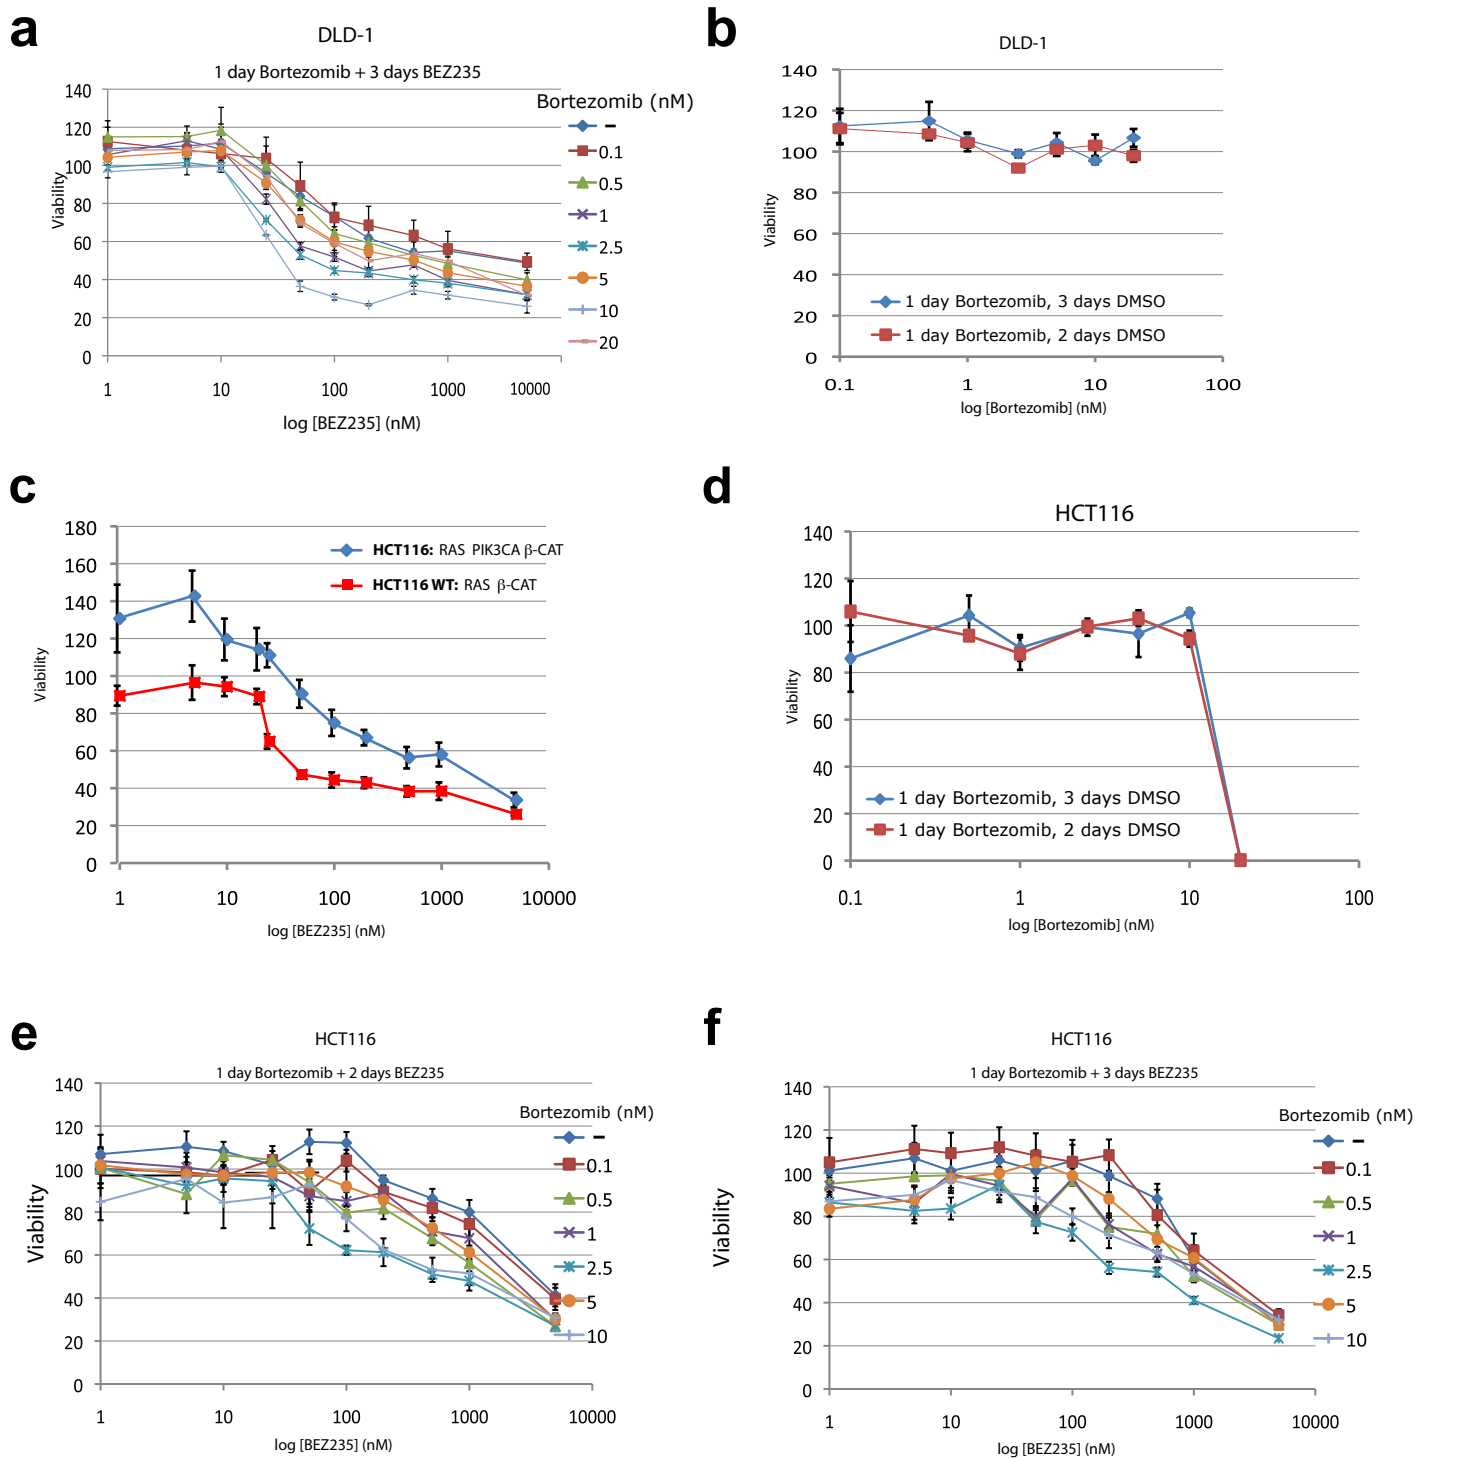

**Supplementary Figure 6. Increased sensitivity of DLD-1 and HCT116 cells to BEZ235 after pre-treatment with bortezomib.** **a**, BEZ235 dose response curve after 3 days of BEZ235 treatment of DLD-1 cells that are pretreated with DMSO or indicated doses of bortezomib for 1 day. **b**, Bortezomib pre-treatment alone at the doses used for sequential treatment did not affect the viability of DLD-1 cells. **c**, BEZ235 dose response curve of HCT116 parental (Ras and PI3K active) versus HCT116-WT (Ras active, PI3K wildtype) cell lines. **d**, Bortezomib pre-treatment alone at the doses used for sequential treatment did not affect the viability of HCT116 cells. **e,f**, BEZ235 dose response curve after 2 (**e**) and 3 (**f**) days of treatment of HCT116 cells that were pretreated with DMSO (control) or indicated doses of bortezomib for 24 hours. Error bars: standard error of the mean.

**a**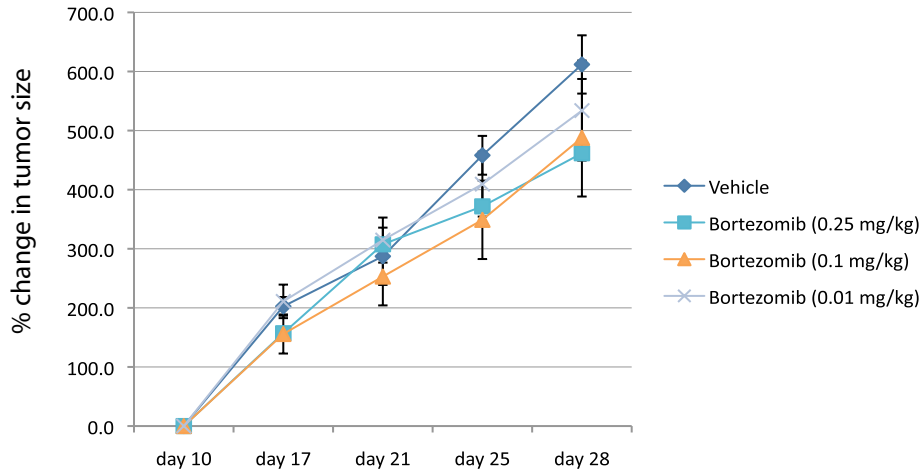**b**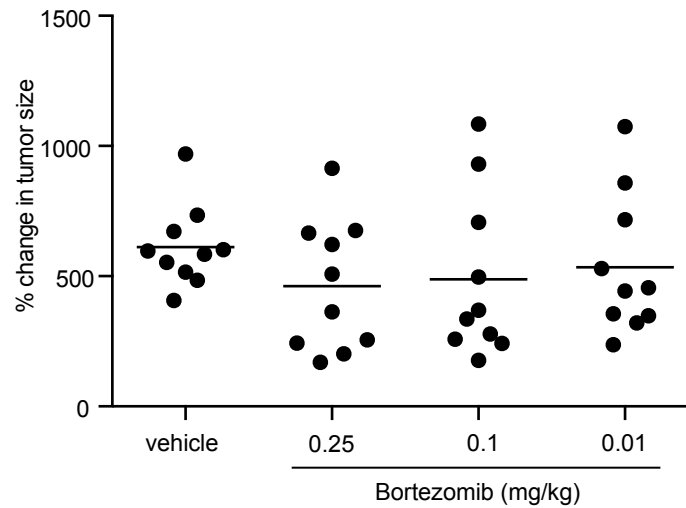

**Supplementary Figure 7. Bortezomib alone controls for the xenografts.** **a**, Growth rates of DLD-1 xenograft tumors treated with vehicle and indicated doses of bortezomib once a week for 3 weeks. **b**, % change in volumes of DLD-1 xenograft tumors at the last day of treatment. Bortezomib treated samples were not significantly different than vehicle treated tumors (Mann-Whitney test). Error bars: standard error of the mean.

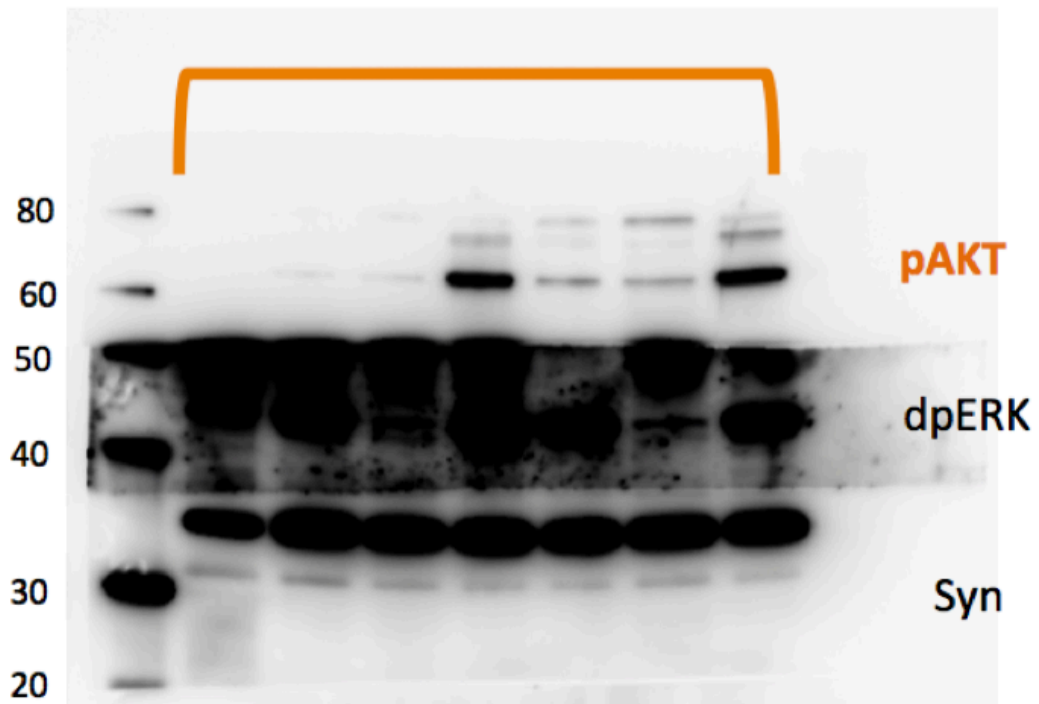

9 min

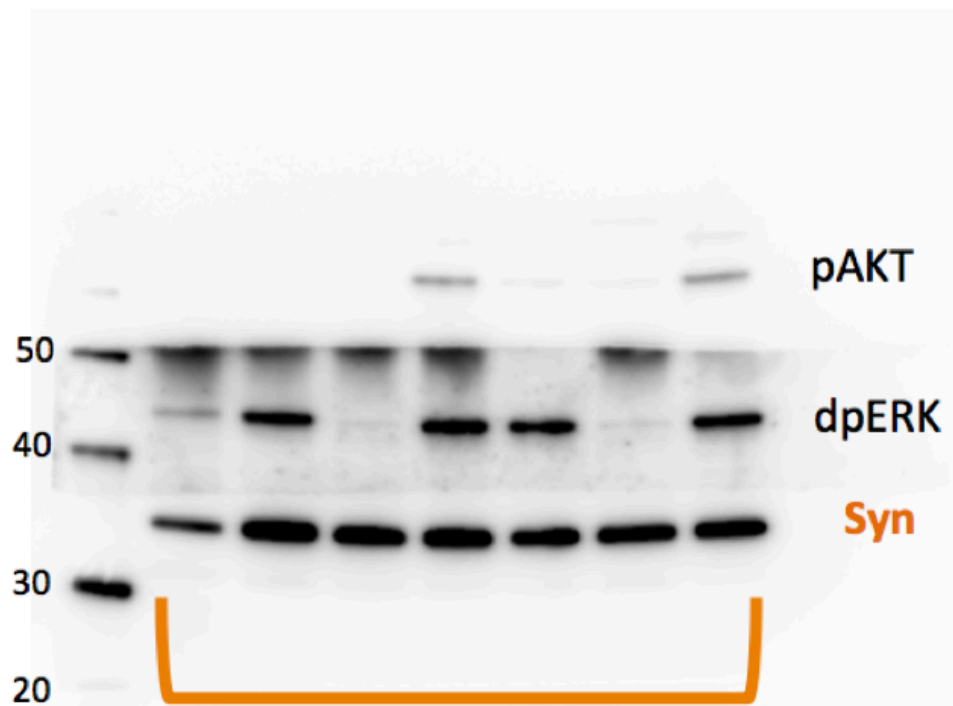

1 min

**Supplementary Figure 8a:** Original blots for pAKT and Syn shown in Figure 6d. Regions indicated in bold orange text and brackets are cropped to generate panel 6d. Images are not altered in any other way.



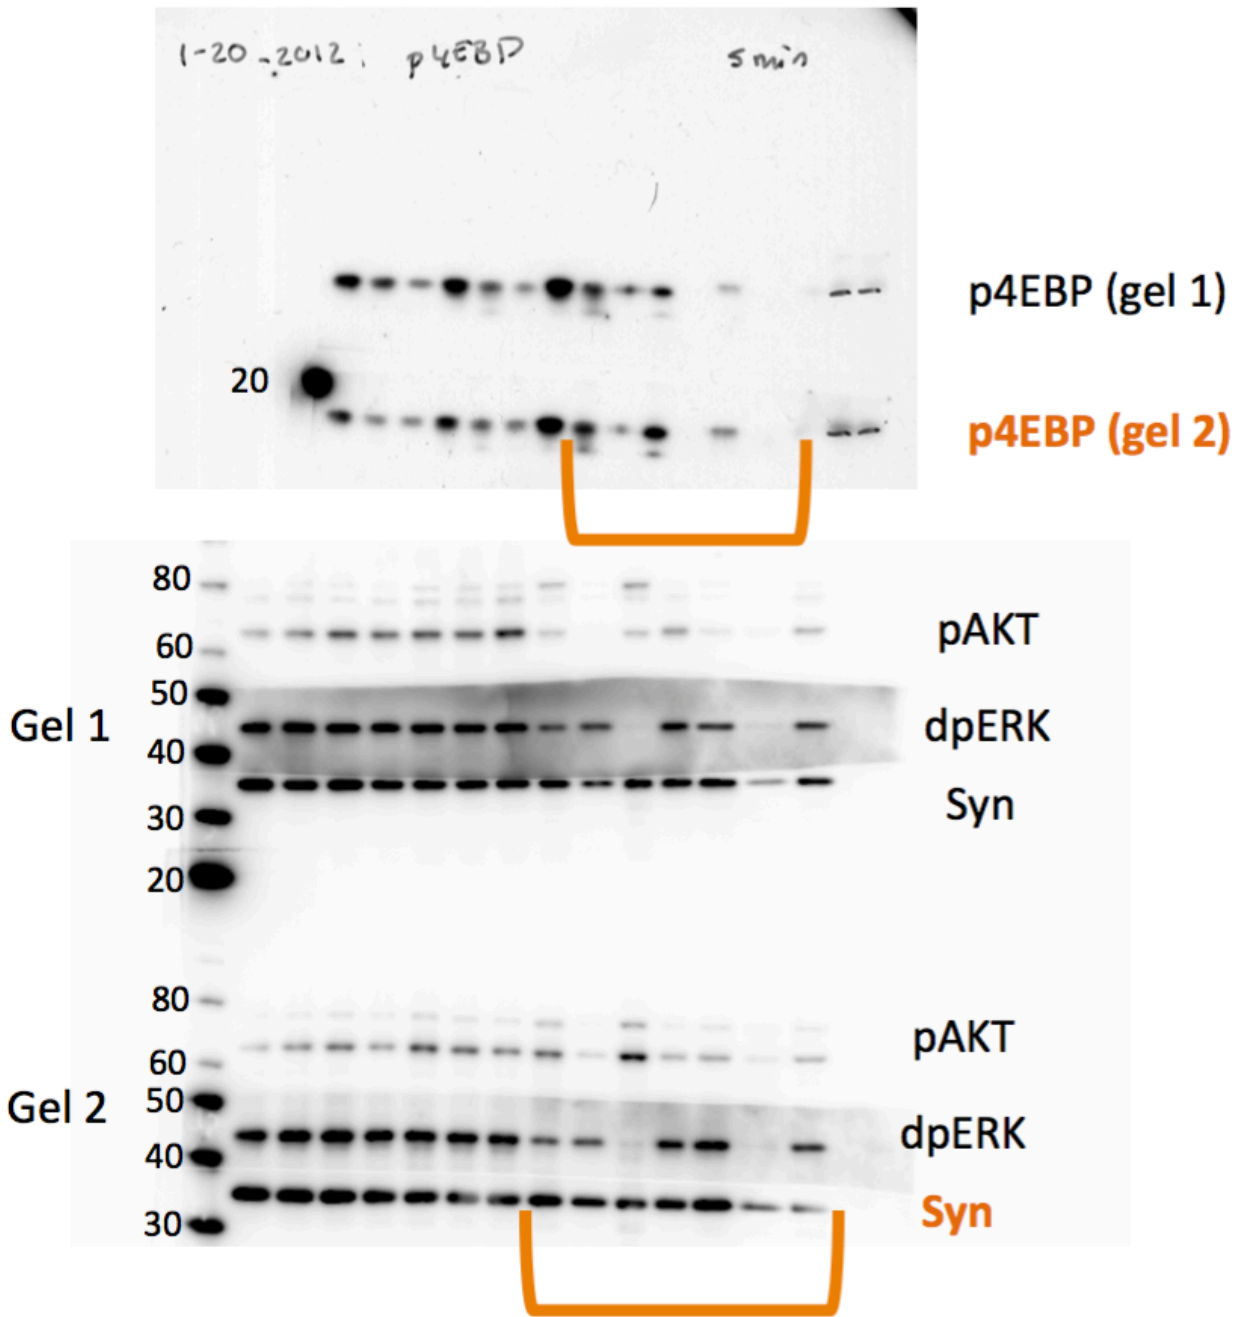

**Supplementary Figure 8b:** Original blots for p4EBP and Syn shown in Figure 6d. Regions indicated in bold orange text and brackets are cropped to generate panel 6d. Images are not altered in any other way. First 7 lanes that are cropped out are from an unrelated experiment.

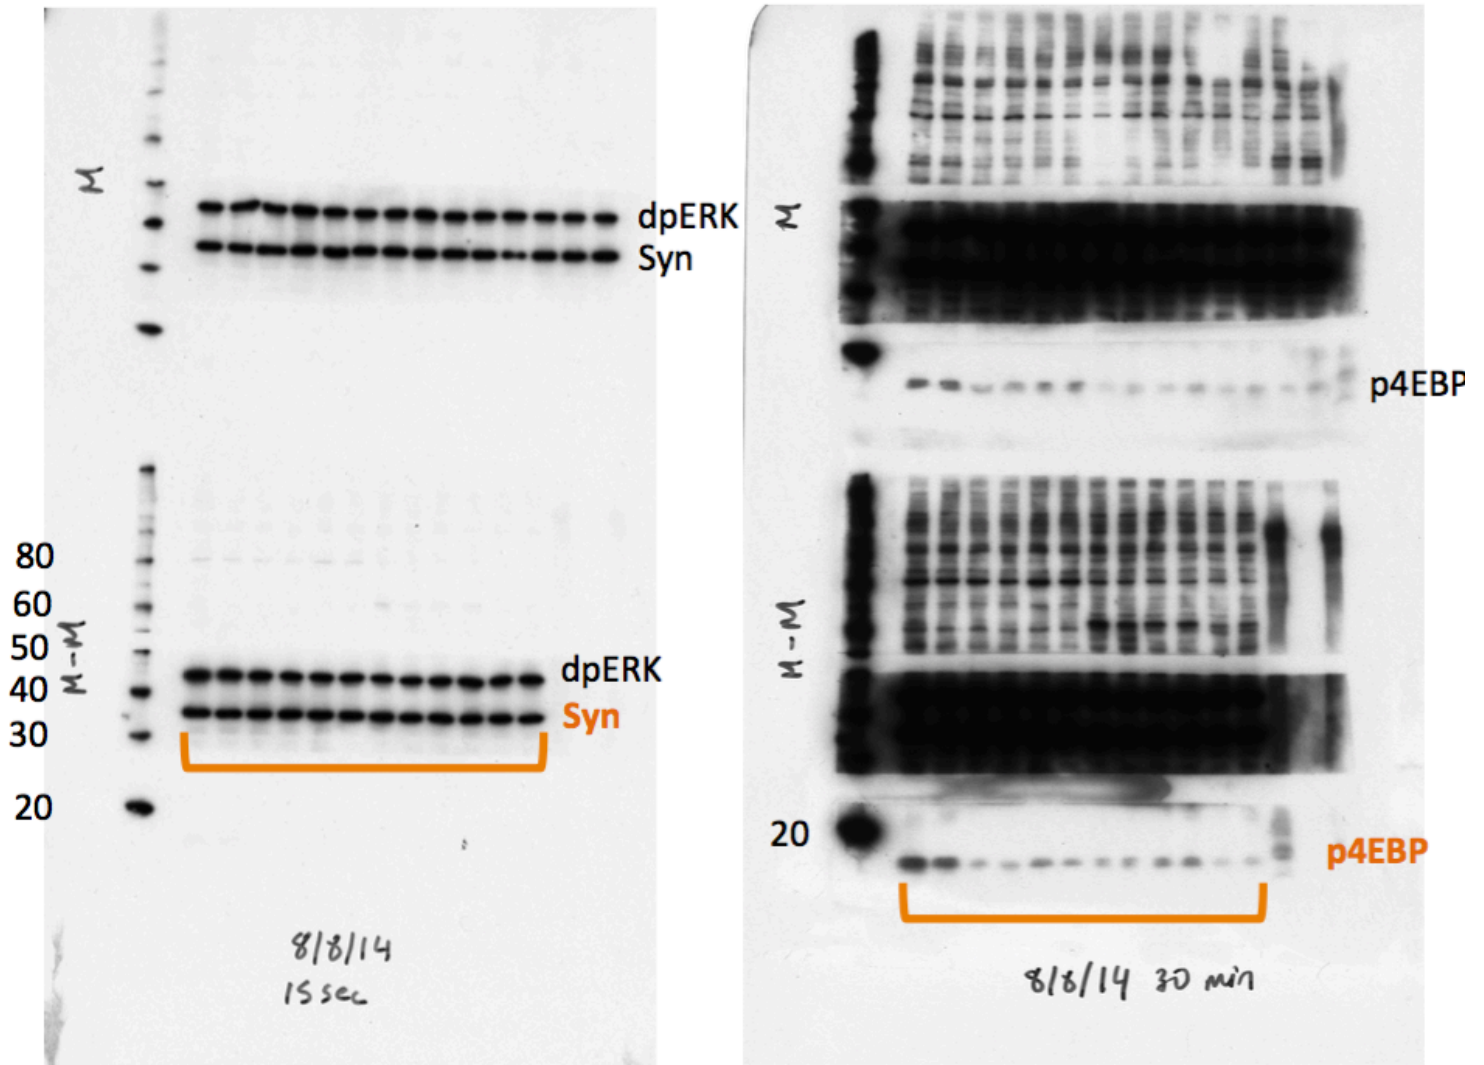

**Supplementary Figure 8c:** Original blots for p4EBP and Syn shown in Figure 6f. Regions indicated in bold orange text and brackets are cropped to generate panel 6f. Images are not altered in any other way.

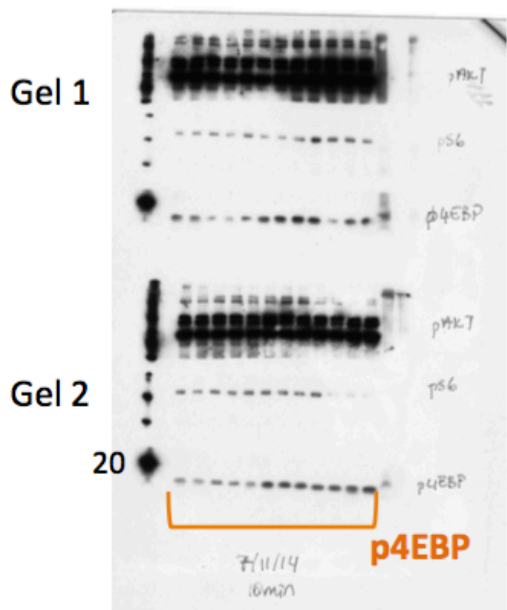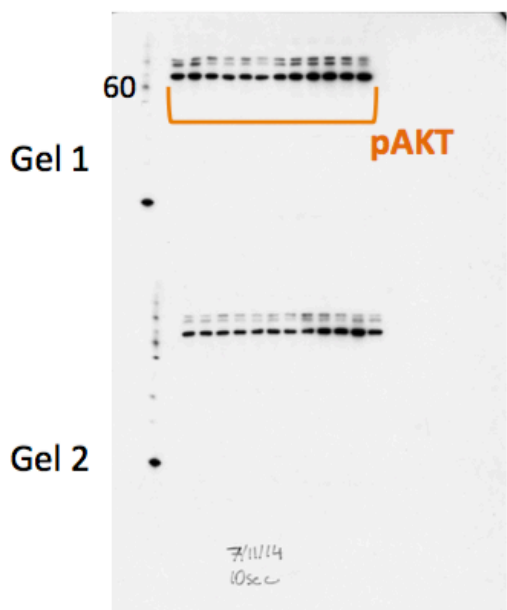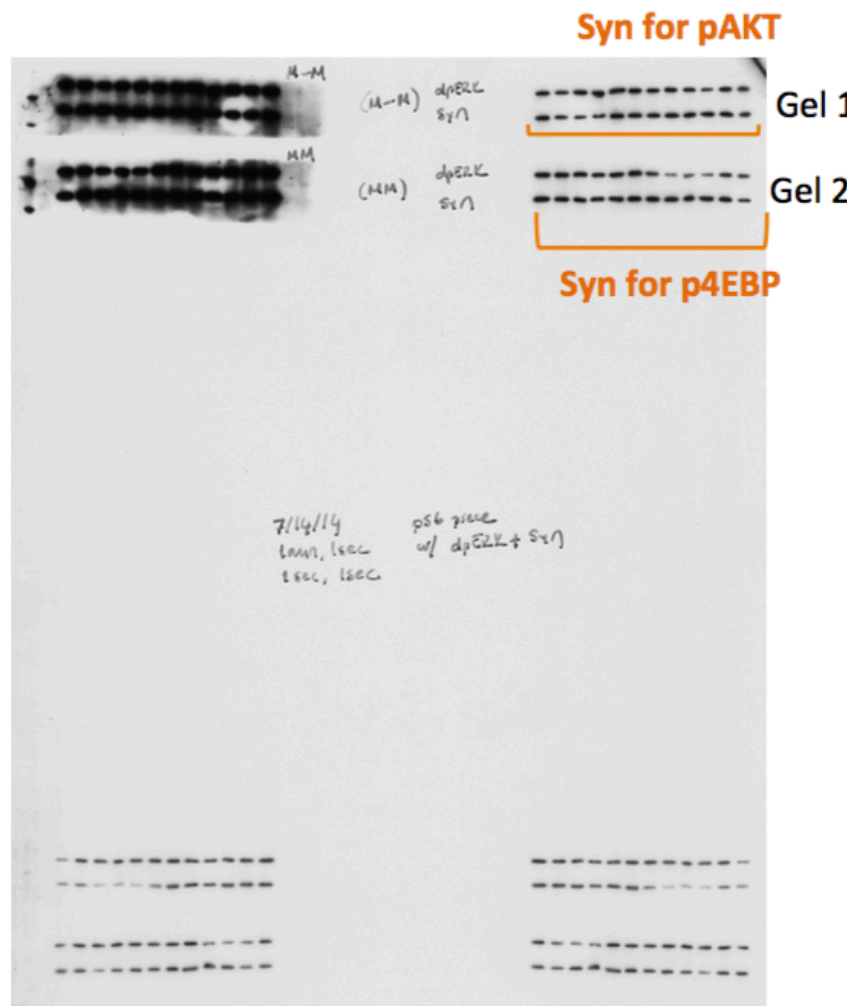

**Supplementary Figure 8d:** Original blots for p4EBP, pAKT and Syn shown in Figure 7a. Regions indicated in bold orange text and brackets are cropped to generate panel 7a. Images are not altered in any other way.

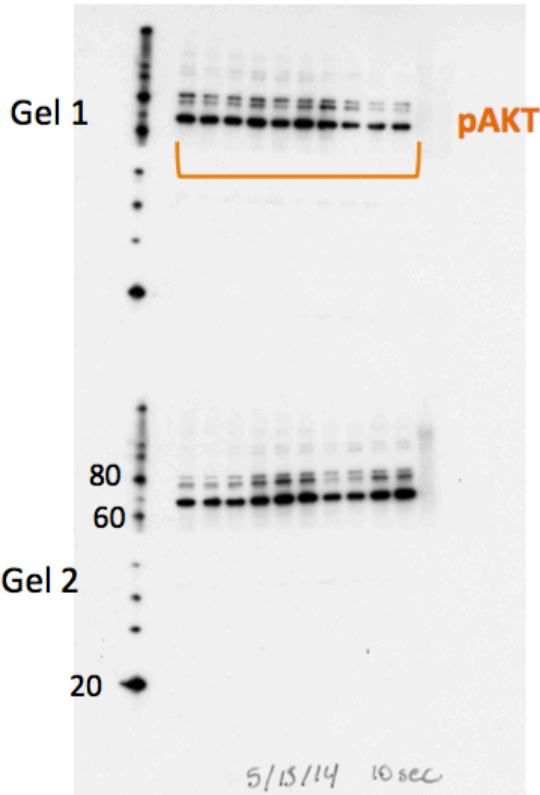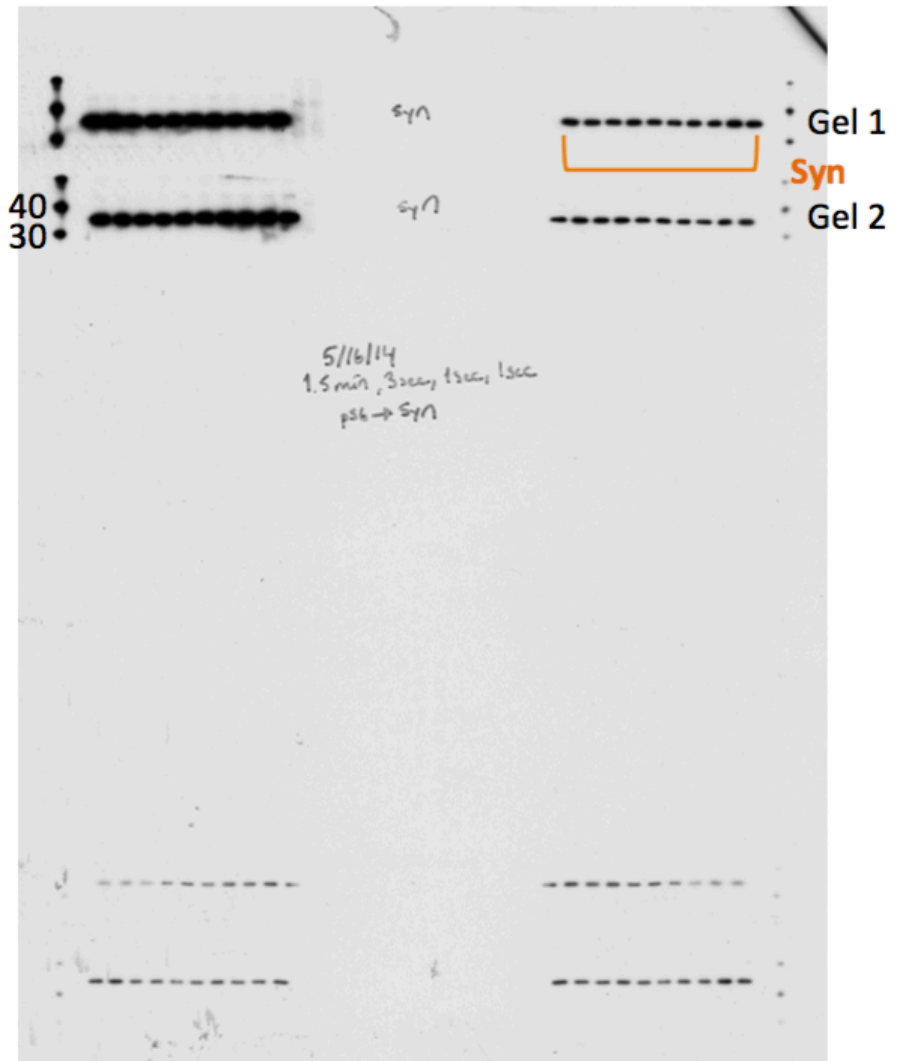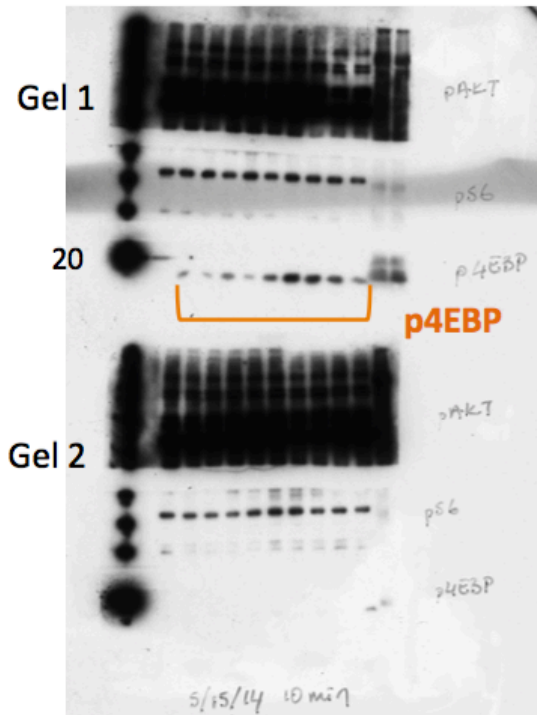

**Supplementary Figure 8e:** Original blots for p4EBP, pAKT and Syn shown in Figure 8a. Regions indicated in bold orange text and brackets are cropped to generate panel 8a. Images are not altered in any other way.

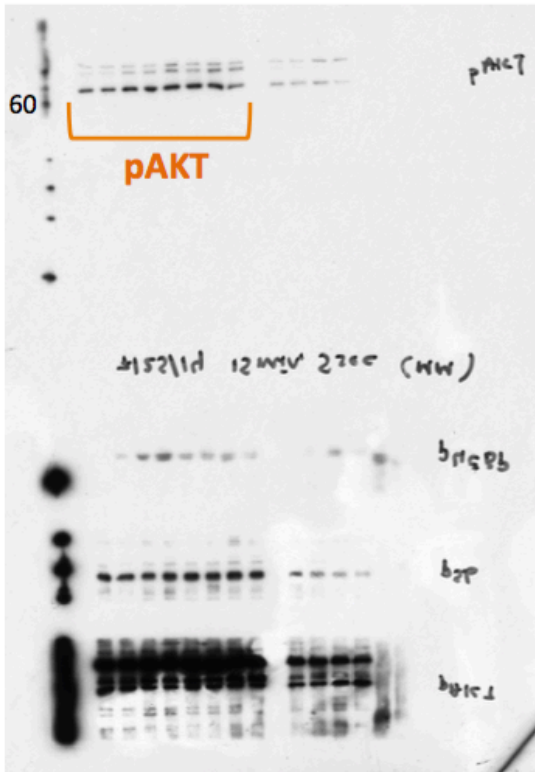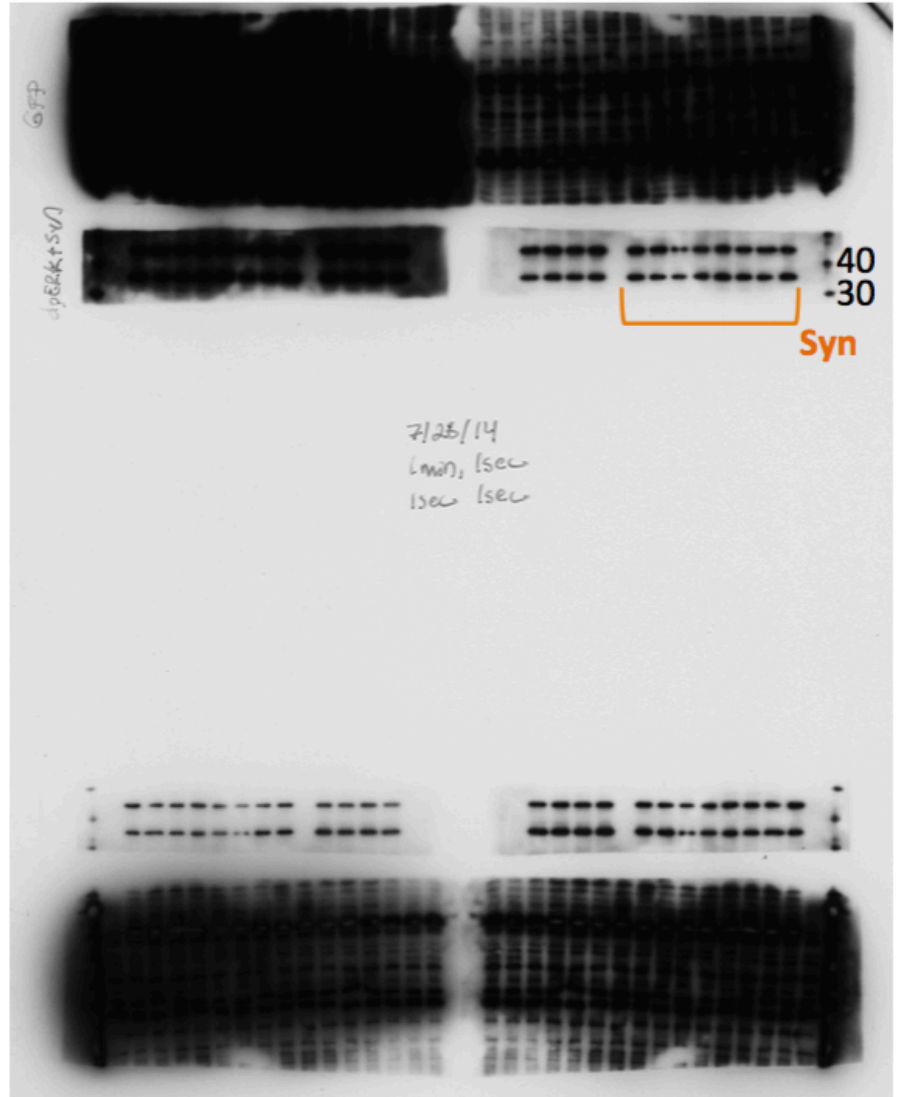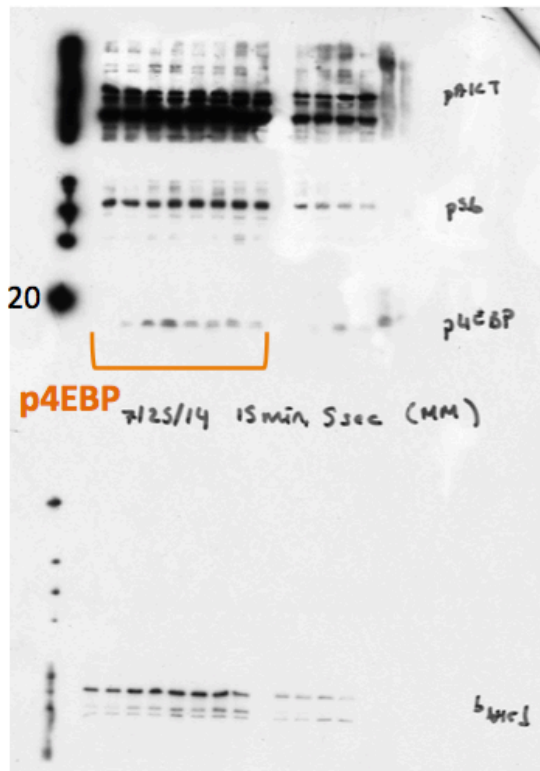

**Supplementary Figure 8f:** Original blots for p4EBP, pAKT and Syn shown in Figure 8d. Regions indicated in bold orange text and brackets are cropped to generate panel 8d. Images are not altered in any other way.

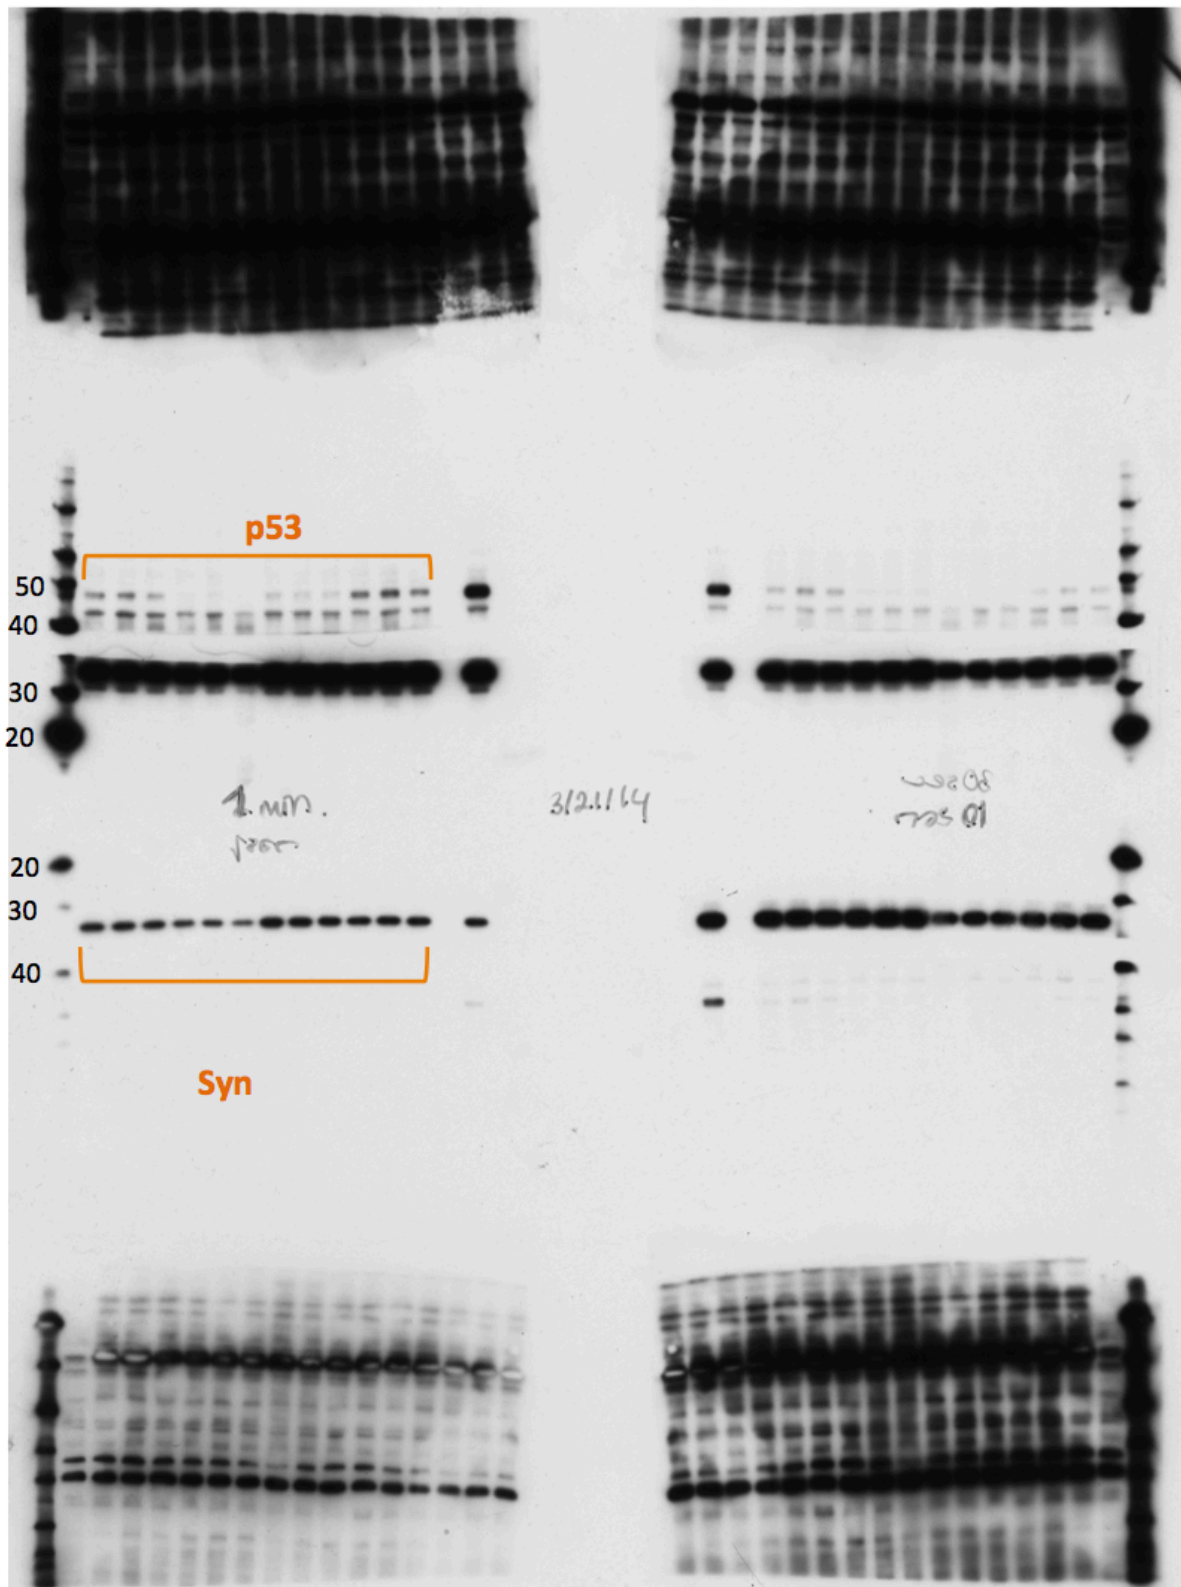

**Supplementary Figure 8g:** Original blots for p53 and Syn shown in Supplementary Figure 1a. Regions indicated in bold orange text and brackets are cropped to generate the original panel. Images are not altered in any other way. Last lane is from animals overexpressing p53; it is used to confirm the p53 band and is cropped out in the main figure.

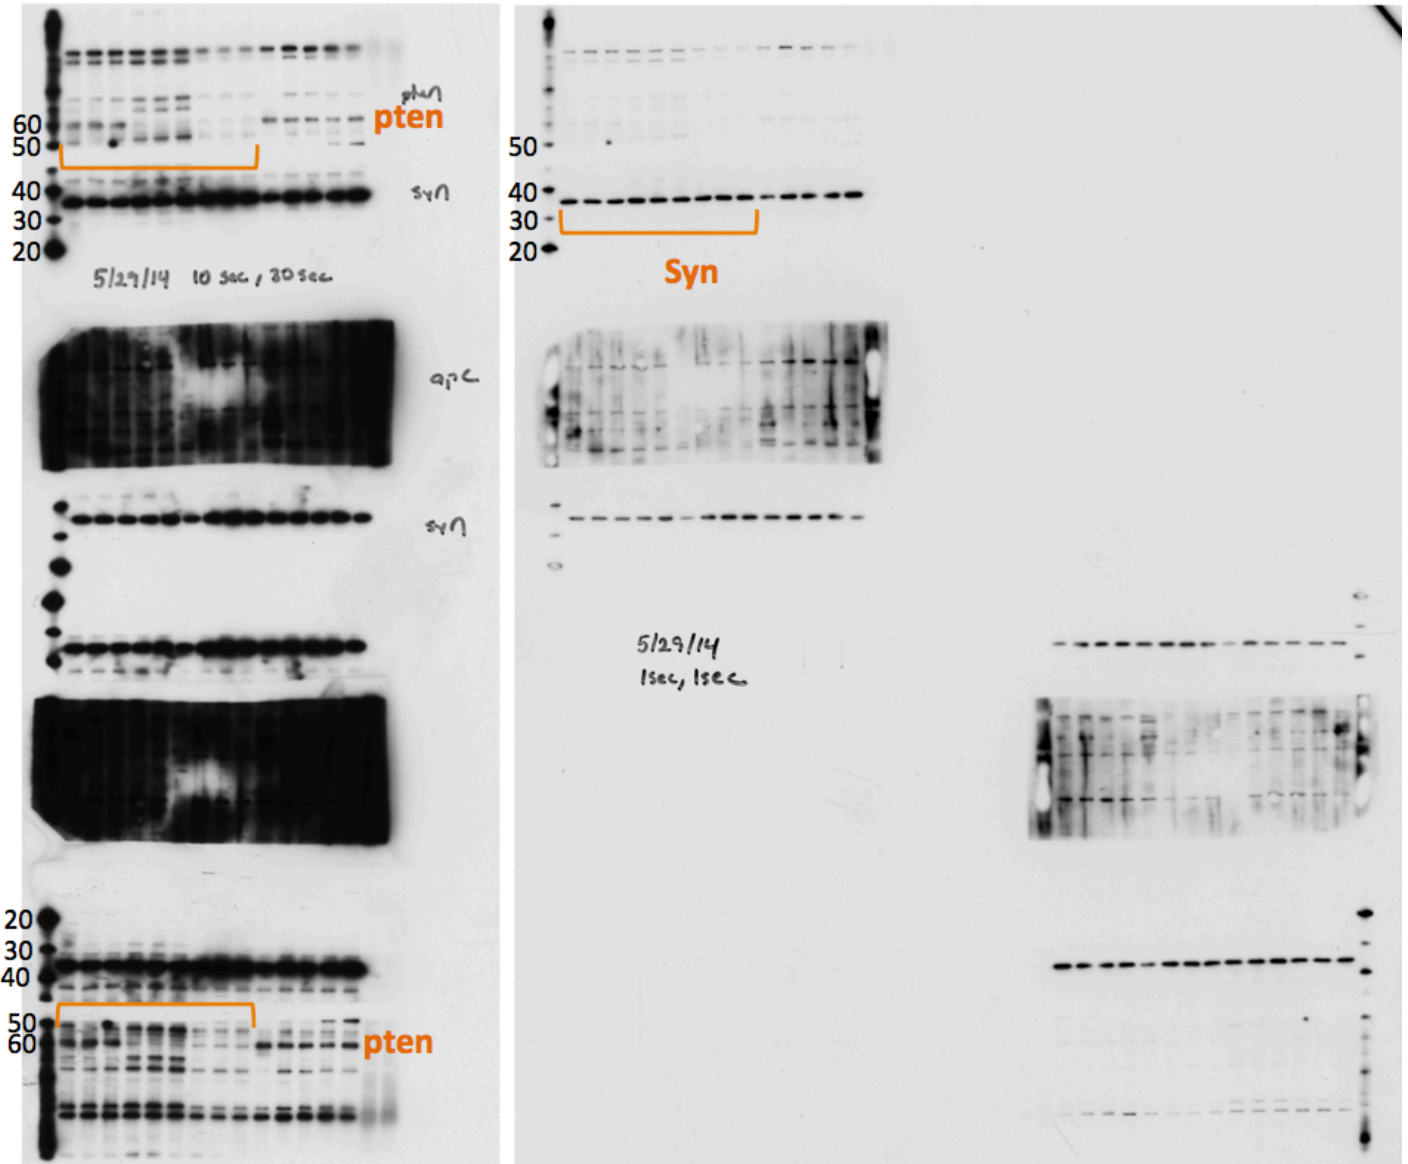

**Supplementary Figure 8h:** Original blots for pten and Syn shown in Supplementary Figure 1b. Regions indicated in bold orange text and brackets are cropped to generate the panel. Images are not altered in any other way.

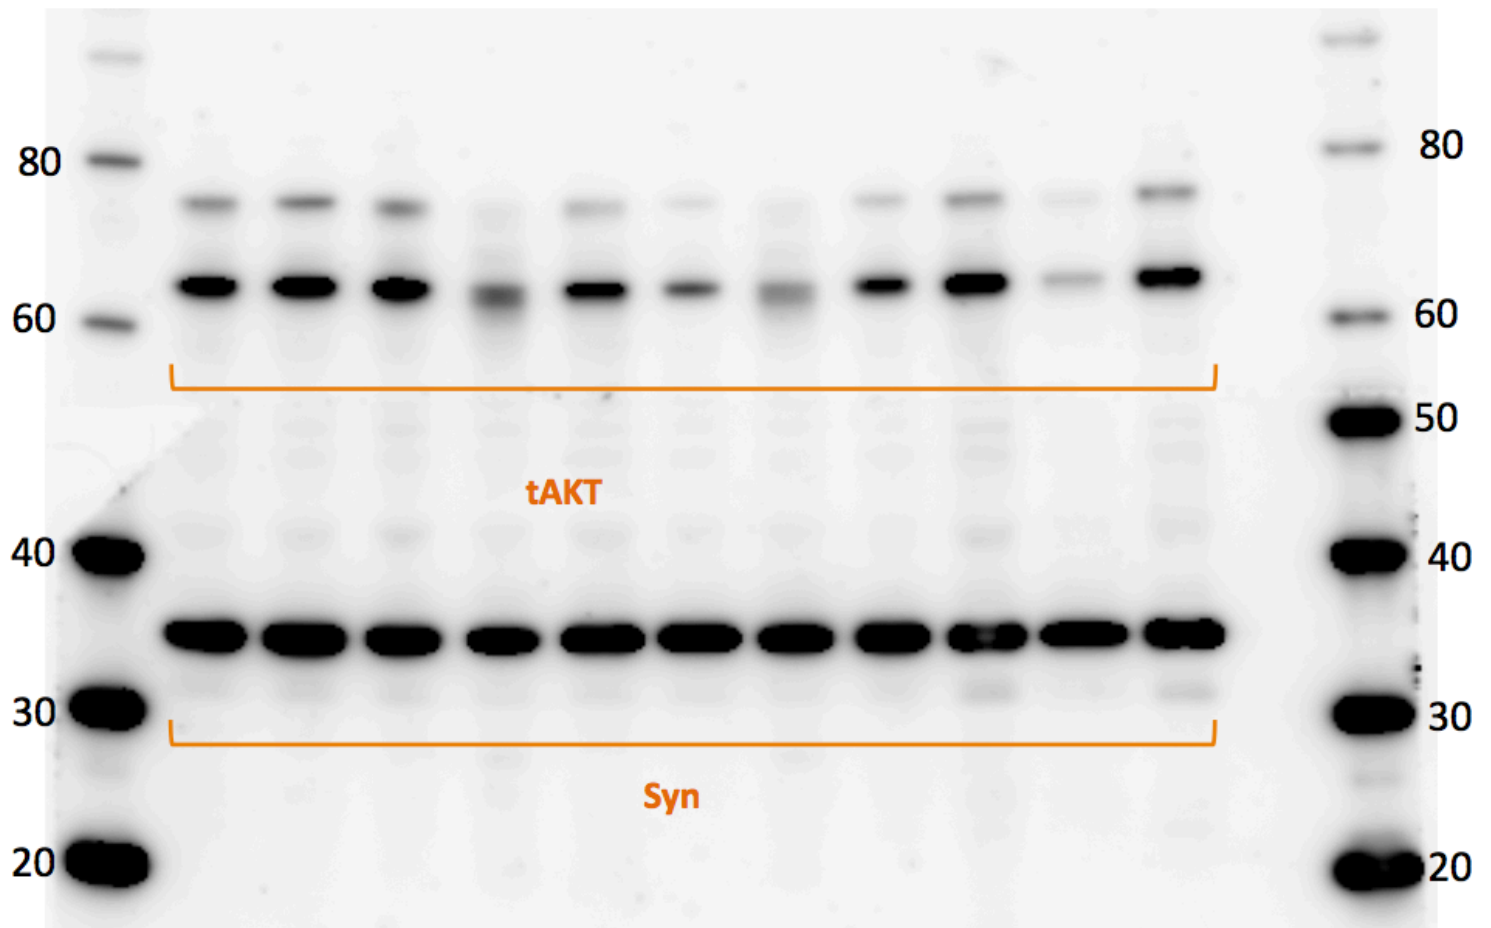

**Supplementary Figure 8i:** Original blots for total AKT and Syn shown in Supplementary Figure 5. Regions indicated in bold orange text and brackets are cropped to generate Supplementary Figure 5. Images are not altered in any other way.



**Supplementary Table 1.** Recurrently mutated genes identified by TCGA in colorectal tumors

|                 | <b>GENE_SYMBOL</b> | <b>NUM_CASES_ALTERED</b> | <b>PERCENT_CASES_ALTERED</b> |
|-----------------|--------------------|--------------------------|------------------------------|
| <b>WNT</b>      | APC                | 162                      | 76%                          |
|                 | TCF7L2             | 30                       | 14%                          |
|                 | AMER1              | 24                       | 11%                          |
|                 | AXIN2              | 14                       | 6%                           |
|                 | CTNNB1             | 11                       | 5%                           |
|                 | FZD10              | 1                        | 1%                           |
| <b>TGF-beta</b> | <b>GENE_SYMBOL</b> | <b>NUM_CASES_ALTERED</b> | <b>PERCENT_CASES_ALTERED</b> |
|                 | SMAD4              | 29                       | 13%                          |
|                 | ACVR2A             | 25                       | 11%                          |
|                 | TGFBR2             | 22                       | 10%                          |
|                 | SMAD2              | 16                       | 7%                           |
|                 | ACVR1B             | 16                       | 7%                           |
|                 | SMAD3              | 9                        | 4%                           |
| TGFBR1          | 7                  | 3%                       |                              |
| <b>RTK/RAS</b>  | <b>GENE_SYMBOL</b> | <b>NUM_CASES_ALTERED</b> | <b>PERCENT_CASES_ALTERED</b> |
|                 | KRAS               | 89                       | 42%                          |
|                 | BRAF               | 22                       | 10%                          |
|                 | NRAS               | 20                       | 9%                           |
|                 | ERBB2              | 14                       | 6%                           |
| ERBB3           | 14                 | 6%                       |                              |
| <b>PI3K</b>     | <b>GENE_SYMBOL</b> | <b>NUM_CASES_ALTERED</b> | <b>PERCENT_CASES_ALTERED</b> |
|                 | PIK3CA             | 31                       | 14%                          |
|                 | PTEN               | 13                       | 6%                           |
|                 | PIK3R1             | 9                        | 4%                           |
|                 | IGF2               | 5                        | 2%                           |
| IRS2            | 3                  | 1%                       |                              |
| <b>P53</b>      | <b>GENE_SYMBOL</b> | <b>NUM_CASES_ALTERED</b> | <b>PERCENT_CASES_ALTERED</b> |
|                 | TP53               | 111                      | 52%                          |
|                 | ATM                | 26                       | 12%                          |

---

**Supplementary Table 2.** Fly models based on TCGA patients

---

| <b>fly models</b>            | <b># of patients</b> | <b>Frequency in the patient population</b> |
|------------------------------|----------------------|--------------------------------------------|
| ras p53 pten dSmad4 apc      | 10                   | 4.7                                        |
| <b>total # of quintuples</b> | <b>10</b>            | <b>4.7</b>                                 |
| ras p53 dSmad4 apc           | 15                   | 7.1                                        |
| ras pten dSmad4 apc          | 10                   | 4.7                                        |
| ras p53 pten apc             | 5                    | 2.4                                        |
| p53 pten dSmad4 apc          | 1                    | 0.5                                        |
| ras p53 pten dSmad4          | 0                    | 0.0                                        |
| <b>total # of quadruples</b> | <b>31</b>            | <b>14.6</b>                                |
| ras p53 apc                  | 32                   | 15.1                                       |
| ras dSmad4 apc               | 13                   | 6.1                                        |
| p53 dSmad4 apc               | 12                   | 5.7                                        |
| ras pten apc                 | 9                    | 4.2                                        |
| ras p53 pten                 | 6                    | 2.8                                        |
| p53 pten apc                 | 4                    | 1.9                                        |
| ras p53 dSmad4               | 3                    | 1.4                                        |
| ras pten dSmad4              | 2                    | 0.9                                        |
| pten dSmad4 apc              | 2                    | 0.9                                        |
| <b>total # of triples</b>    | <b>83</b>            | <b>39.2</b>                                |
| p53 apc                      | 29                   | 13.7                                       |
| ras apc                      | 16                   | 7.5                                        |
| ras p53                      | 9                    | 4.2                                        |
| ras dSmad4                   | 3                    | 1.4                                        |
| pten apc                     | 3                    | 1.4                                        |
| p53 dSmad4                   | 2                    | 0.9                                        |
| p53 pten                     | 1                    | 0.5                                        |
| dSmad4 apc                   | 1                    | 0.5                                        |
| <b>total # of doubles</b>    | <b>64</b>            | <b>30.2</b>                                |
| apc                          | 16                   | 7.5                                        |
| p53                          | 3                    | 1.4                                        |
| ras                          | 2                    | 0.9                                        |
| dSmad4                       | 1                    | 0.5                                        |
| pten                         | 0                    | 0.0                                        |
| <b>total # of singles</b>    | <b>22</b>            | <b>10.4</b>                                |
| <b>none</b>                  | <b>2</b>             | <b>0.9</b>                                 |

---
